# Supplementary material for: Atmospheric impacts of chlorinated very short-lived substances over the recent past – Part 2: Impacts on ozone
Source: Copernicus journal article supplement (doi:10.5194/acp-23-13701-2023), 2023-11-03
Supplement: Supplementary file 1 [file acp-23-13701-2023-supplement.pdf]

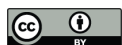

*Supplement of*

## **Atmospheric impacts of chlorinated very short-lived substances over the recent past – Part 2: Impacts on ozone**

**Ewa M. Bednarz et al.**

*Correspondence to:* Ewa M. Bednarz ([ewa.bednarz@noaa.gov](mailto:ewa.bednarz@noaa.gov))

The copyright of individual parts of the supplement might differ from the article licence.

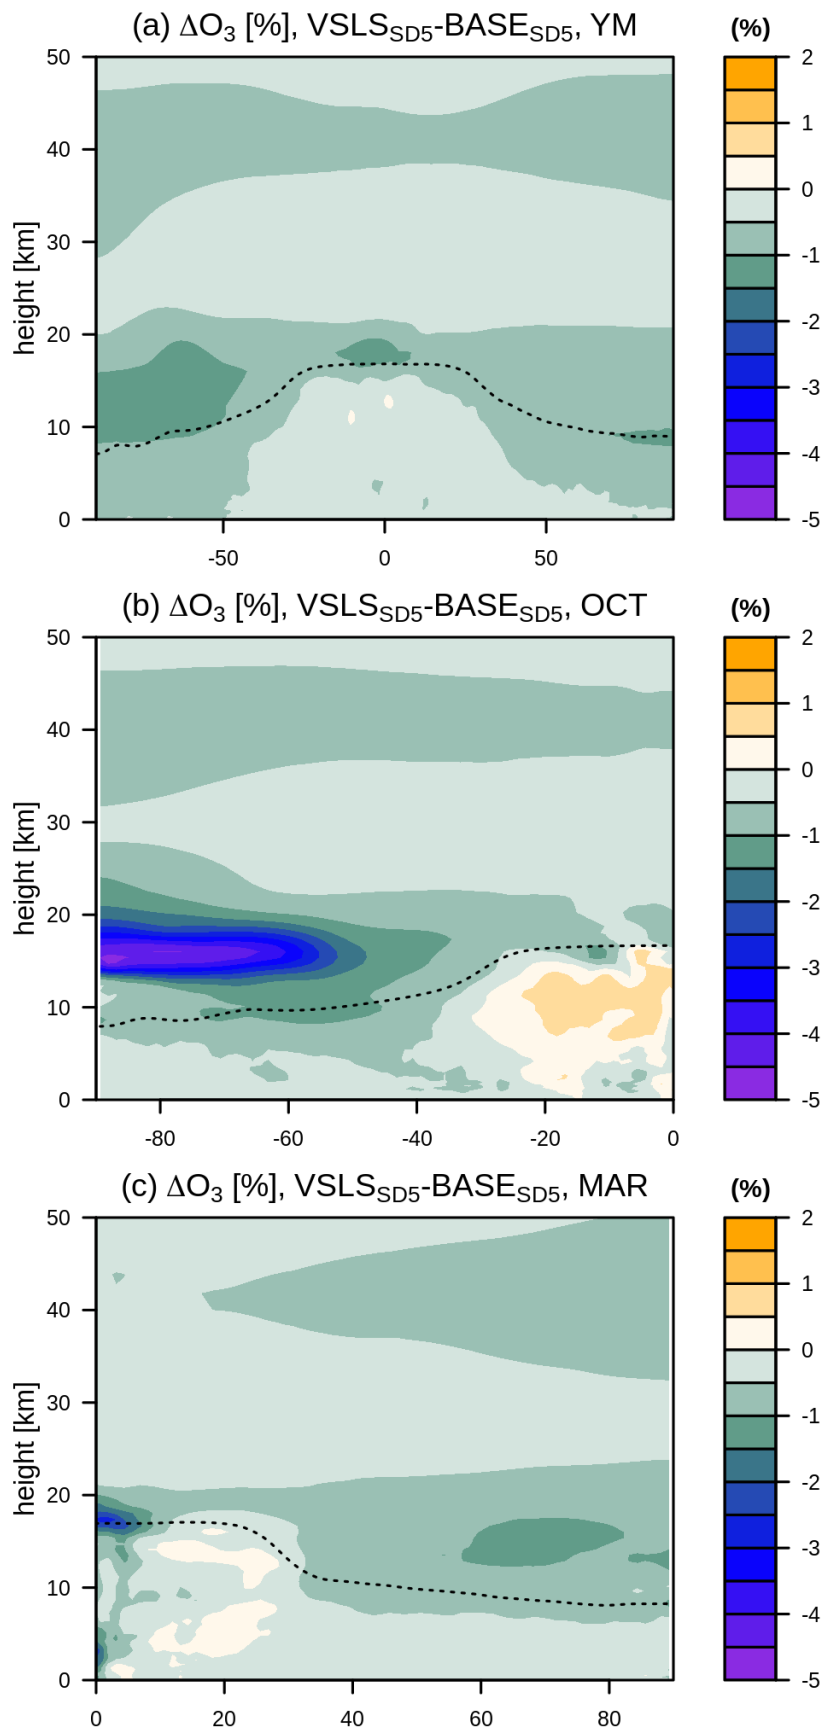

**Figure S1.** As in Figure 2 but for the mean over 2017-2019 inclusive.

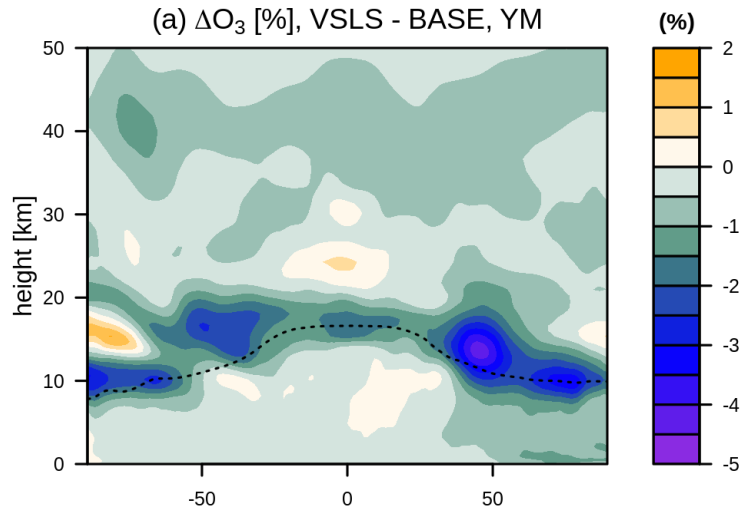

**Figure S2.** As in Figure 2a but for the ensemble mean difference derived from the free-running simulations (VLSL and BASE).

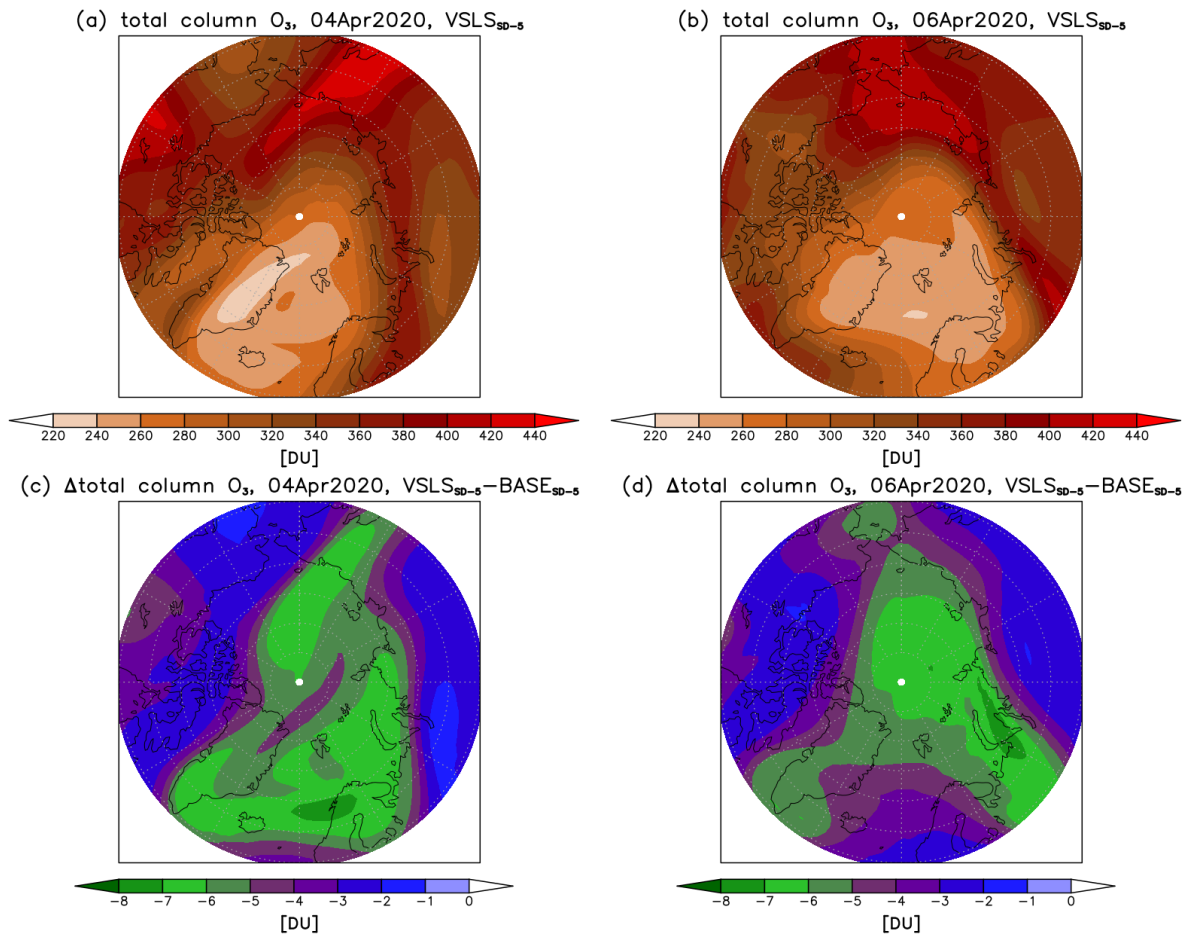

**Figure S3.** Stereographic projections poleward of 60°N of daily mean total column ozone [DU] on (a) 04 Apr 2020 and (b) 06 April 2020 simulated in the nudged VLSL<sub>SD-5</sub> run. Panels (c-d) show the respective differences between VLSL<sub>SD-5</sub> and BASE<sub>SD-5</sub> runs.

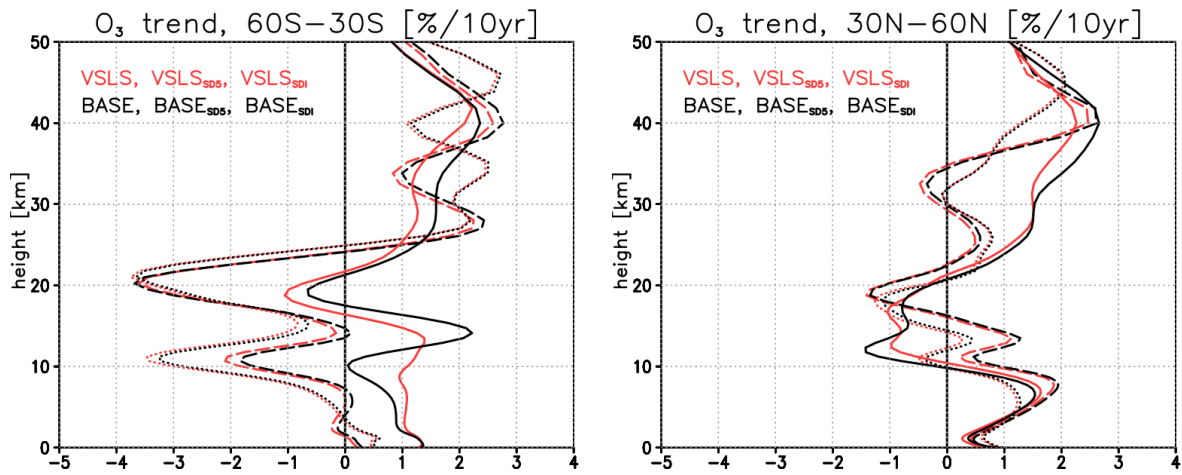

**Figure S4.** Linear trends in de-seasonalised  $O_3$  mixing ratios over December 1999 to August 2019 [% per 10 years] averaged over (left) 30N-60N and (right) 60S-30S. The simulations with CI-VLSL included are in red, and the simulations without CI-VLSL are in black. Solid lines are for the free-running simulations (VLSL and BASE), dashed lines are for the simulations nudged to ERA5 (VLSL<sub>SD-5</sub> and BASE<sub>SD-5</sub>), and dotted lines are for the simulations nudged to ERA-Interim (VLSL<sub>SD-I</sub> and BASE<sub>SD-I</sub>).

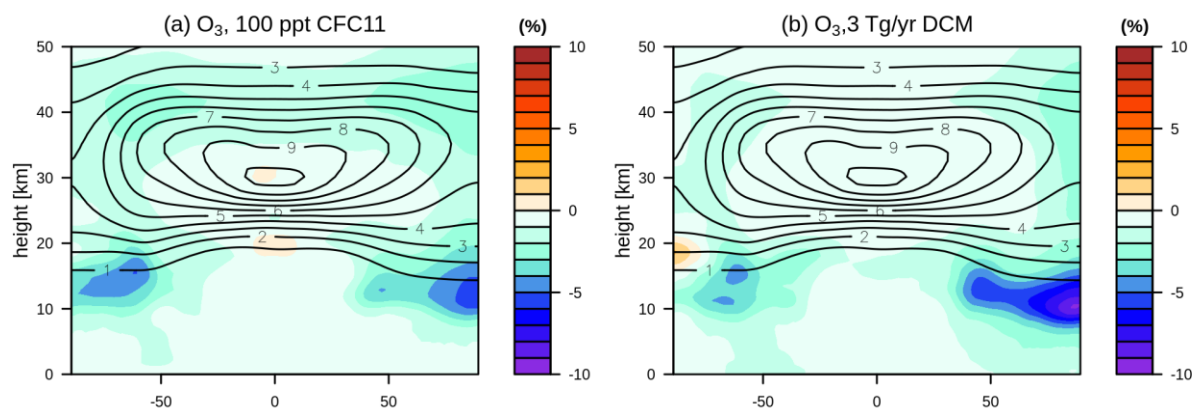

**Figure S5.** Shading: Yearly mean changes in ozone mixing ratios [%] compared to base case simulation for the simulation with (a) additional 100 ppt CFC-11 at the surface, and (b) 3 Tg/yr  $CH_2Cl_2$  emissions. Contours show the corresponding ozone values [ppm] in the base case run for reference.

### imposed $\text{CH}_2\text{Cl}_2$ emissions

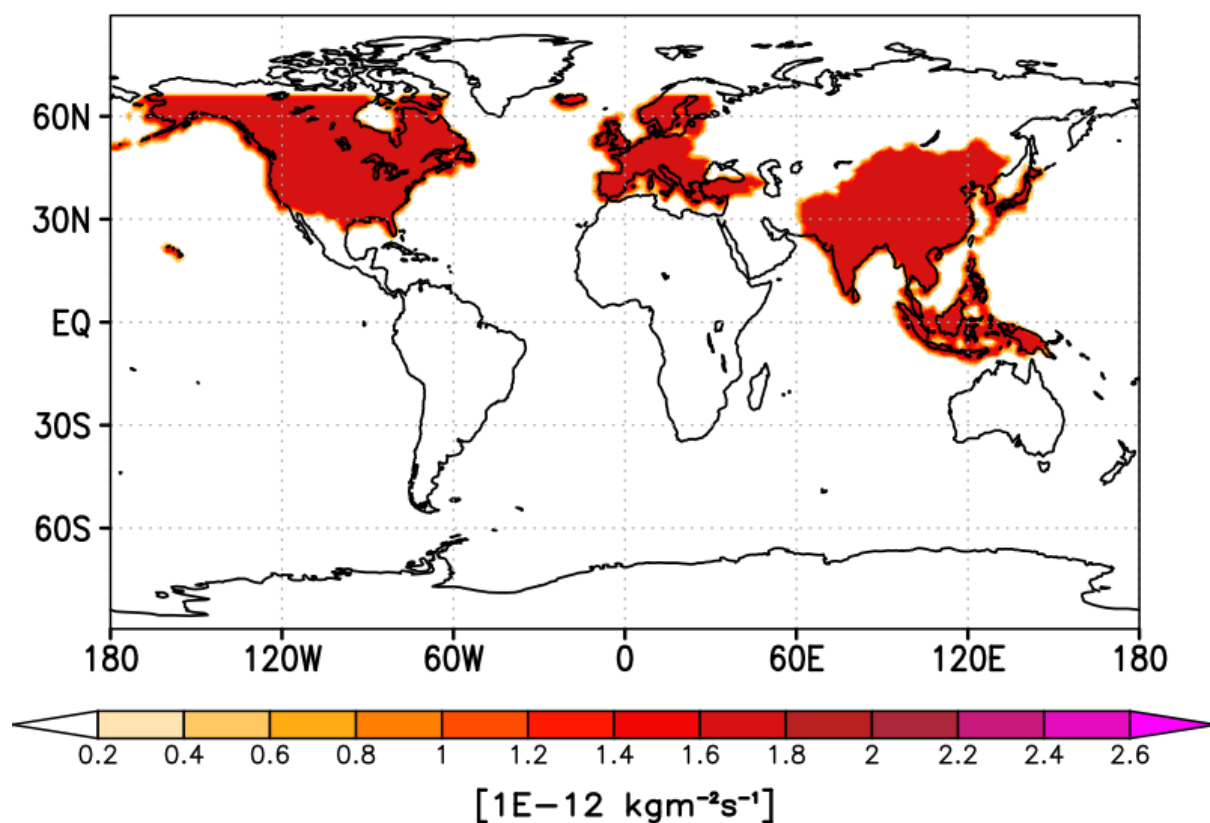

**Figure S6.** Imposed surface  $\text{CH}_2\text{Cl}_2$  emissions corresponding to 3 Tg/yr in the time-slice simulations used for the ODP calculation.
